# Supplementary material for: Increasing Costs Due to Ocean Acidification Drives Phytoplankton to Be More Heavily Calcified: Optimal Growth Strategy of Coccolithophores
Source: PLoS One. 2010 Oct 15;5(10):e13436. doi: 10.1371/journal.pone.0013436 (PMC2955539; doi:10.1371/journal.pone.0013436)
Supplement: Appendix S3 — Optimal life history (k≠β). (0.03 MB DOC) [file pone.0013436.s003.doc]

**APPENDIX S3: Optimal Life History (*k* ≠ β)**

If we do not assume any relationship between *k* and β, multiple numerical techniques are required to compute the fitness. We here consider to calculate the intrinsic rate of population increase:

[C1]

from a given set of . Solving equation [A6] for *u*, and substituting *V* with *C*/δ gives

. [C2]

We have the growth equation of coccolith volume as

, [C3]

by substituting and *u* with equation [C2] and *V* with *C*/δ in equation (2). Accordingly, generation time, *T*, is given as the numerical solution at of the differential equation

[C4]

with the initial condition that , i.e.,

. [C5]

Equations [C3] and [C5] provide sufficient information for numerically solving the integral in equation [C1]. Optimal growth schedules at different sets of α and β were determined using a stochastic iterated hill climbing program on the platforms of Mathematica (ver. 7.0; for Windows, Wolfram Research).
