# Supplementary material for: Increasing Costs Due to Ocean Acidification Drives Phytoplankton to Be More Heavily Calcified: Optimal Growth Strategy of Coccolithophores
Source: PLoS One. 2010 Oct 15;5(10):e13436. doi: 10.1371/journal.pone.0013436 (PMC2955539; doi:10.1371/journal.pone.0013436)
Supplement: Appendix S6 — Total precipitated CaCO3 (q = 2(1−k)). (0.11 MB DOC) [file pone.0013436.s006.doc]

**APPENDIX S6: Total Precipitated CaCO3 (*q* = 2 (1 –** ***k*))**

**1. Impact on the expected amount of CaCO3 left by a daughter cell that dies for a generation (Ξ) when *k* = β:** This quantity is expressed as:

(from equation [4])

(partial derivative)

. (integration by substitution) [F1-1]

Considering that coccolithophores adopt the optimal strategy, the dependency of Ξ* on a given acidification-sensitive parameter, *x*, is given as:

. (because the second and third terms balance) [F1-2]

The probability of survival, *L*, as a function of *C* instead of *t* is given as:

(from equation [6] with *q* = 2(1–*k*))

(integration by substitution)

(from equations [2])

. [F1-3]

The partial derivative of *L*(*C*) with respect to *a*, *s*, or α (denoted by *x*) is:

. [F1-4]

Taking logarithm of equation [B5-4], and then differentiating with respect to *x* makes this equation simpler:

. [F1-5]

Thus it is evident that on the closed interval . On the other hand, the partial derivative of *L*(*C*) with respect to *P* is:

. [F1-6]

Taking logarithm of equation [B5-4], and then differentiating with respect to *P* suggests that , which simplifies equation [F1-6]:

, [F1-7]

meaning that on the closed interval . From equations [F1-2], [F1-5] and [F1-7], we have , ,, and .

**2. Impact on the CaCO3 left during the bloom (*W*1) when *k* = β:** The partial derivative of *W*1* with respect to *x* is:

. [F2-1]

As analytically demonstrated above, and thus no qualitative conclusion can be drawn for the definite sign of , as far as *L*(*T**) > 0.5.

**3. Impact on the CaCO3 carried over until the end of the bloom (*W*2) when and *k* = β:** On the other hand, the partial derivative of ln *W*2* with respect to *x* is:

. [F3-1]

Taking logarithms of equations [B5-3] and [B5-4], respectively, and then differentiating with respect to *x* suggests that = [2(1–*k*)]–1 if *x* is *a*, *s*, or α. It follows that

, [F3-2]

in which 2 (1 – *k*) should be replaced with 1 – *k*, because = (1 – *k*)–1. Focusing on *s*, α, and *P*, *W*2* has a convex upward function with a minimum point, at which the equality in [F3-2] is fulfilled, because , , and . The inequality signs in [F3-2] reverse when *x* = *a*, but is convex upward against *a* because (see Fig. 6).

**4. Numerical evaluation of *W*1 and *W*2 when *k* = β:** In order to check the algebraic analysis above, the parameter dependencies of *W*1 and *W*2 were numerically examined by substituting equations (13) and (15) with numerically optimized , *T*, and *L*(*T*) and assigning given *N*0 and τ. The computation of Ξ was not straightforward, and performed as follows. With *q* = 2 (1 – k), *L*(*t*) given by equation [B5-1] can be solved as:

. [F4-1]

Solving equation [B1-6] for *t*, and putting it into this equation provides

. [F4-2]

Substituting *L*(*C*) in the third equation of [F1-1] with the right-hand side of [F4-2], and numerically integrating the first term yields Ξ* by assigning optimal and *L*(*T*).

**5. Numerical evaluation of *W*1 and *W*2 when *k* = 2/3 and β = 4/3:** Once the equality between *k* and β breaks, little algebraic analysis can be achieved partly because *L*(*T**) is no longer independent of acidification-driven costs (see Tables 3 and 4). The computation of Ξ was performed in an analogous fashion to the last section; with *q* = 2 (1 – k), *L*(*t*) given by equation [E3-1] can be solved as:

. [F5-1]

Solving equation [E1-3] for *t*, and putting it into this equation provides

[F5-2]

Substituting *L*(*C*) in the third equation of [F1-1] with the right-hand side of [F5-2], and numerically integrating the first term yields Ξ* by assigning optimal and *L*(*T*). *W*1 and *W*2 were computed by substituting equations (13) and (15) with numerically optimized , *T*, and *L*(*T*) and assigning given *N*0 and τ.
